# Supplementary material for: Efficacy of Asymmetric siRNA Targeting Androgen Receptors for the Treatment of Androgenetic Alopecia
Source: PubMed Central journal article supplement — Mol Pharm. 2022 Nov 10;20(1):128–35. doi: 10.1021/acs.molpharmaceut.2c00510 (PMC9812025; doi:10.1021/acs.molpharmaceut.2c00510), 2022-11-10

Table S1

| siRNA     | sense (5'-3')     | antisense (5'-3')      |
|-----------|-------------------|------------------------|
| asiAR-001 | GAGAUGAAGCUUCUGG  | CCAGAAGCUUCAUCCACAG    |
| asiAR-002 | GGAGAUGAAGCUUCUG  | CAGAAGCUUCAUCCACAGA    |
| asiAR-003 | GUGGAGAUGAAGCUUC  | GAAGCUUCAUCCACAGAU     |
| asiAR-004 | UGUGGAGAUGAAGCUU  | AAGCUUCAUCCACAGAUCA    |
| asiAR-005 | UCUGUGGAGAUGAAGC  | GCUUCAUCCACAGAUCAAG    |
| asiAR-006 | UGAUCUGUGGAGAUGA  | UCAUCCACAGAUCAAGCAG    |
| asiAR-007 | CUGAUCUGUGGAGAUG  | CAUCCACAGAUCAAGCAGG    |
| asiAR-008 | AAGACCUGCCUGAUCU  | AGAUCAGGCAGGUCUUCGGG   |
| asiAR-009 | UUUCCACCCAGAAGA   | UCUUCUGGGUGGAAAGUAAU   |
| asiAR-010 | ACUUUCCACCCAGAA   | UUUCUGGGUGGAAAGUAAU    |
| asiAR-011 | AAGGAAACAGAAGUA   | UACUUCUGUUUCCUUCAGCG   |
| asiAR-012 | GAAGGGAACAGAAGU   | ACUUCUGUUUCCUUCAGCGG   |
| asiAR-013 | CUGAAGGGAACAGAA   | UUUCGUUUCCUUCAGCGGU    |
| asiAR-014 | CAAAAGGCCGUGAA    | UUCAGCGGCUUUUUGAAGAA   |
| asiAR-015 | UCAAAAAGAGCCGUGA  | UCAGCGGCUUUUGAAGAAG    |
| asiAR-016 | CUUCAAAAAGAGCCGCU | AGCGGCUUUUGAAGAAGAC    |
| asiAR-017 | CUUCUUCAAAGAGCC   | GGCUCUUUGAAGAAGACCUU   |
| asiAR-018 | UCUUCUCAAAGAGC    | GCUCUUUGAAGAAGACCUUG   |
| asiAR-019 | AGGUCUUCUCAAAG    | CUUUUGAAGAAGACCUUGCAG  |
| asiAR-020 | AAGCAGGGAUGACUCU  | AGAGUCAUCCUGUCUUAUAA   |
| asiAR-021 | UGAAGCAGGGAUGACU  | AGUCAUCCUGUCUUAUAA     |
| asiAR-022 | UUAUGAAGCAGGGAUG  | CAUCCUGUCUUAUAAUUAU    |
| asiAR-023 | UGUUUGAAGCAGGGA   | UCCUGUCUUAUAAUUAUCC    |
| asiAR-024 | AUGUUUGAAGCAGGG   | CCUGUCUUAUAAUUAUCCG    |
| asiAR-025 | GCUAUGAAUGCAGCC   | GGCUGACAUUAUAGCCUUA    |
| asiAR-026 | GGCUAUGAAUGUCAGC  | GCUGACAUUAUAGCCUUA     |
| asiAR-027 | GAAGGCUAUGAAUGUC  | GACAUUAUAGCCUUAUAGU    |
| asiAR-028 | UUGAAGGCUAUGAAUG  | CAUUAUAGCCUUAUAGUUGU   |
| asiAR-029 | GAAGCCAUUGAGCCAG  | CUGGCUAUAGCCUUAUAGG    |
| asiAR-030 | CUGGCUUCCGCAACUU  | AAGUUGCGGAAGCCAGGCAAG  |
| asiAR-031 | UGCCUGGCUUCCGCAA  | UUUGGGAAGCCAGGCAAGG    |
| asiAR-032 | AGUGGGCCAAGGCGCUU | AAGGCGUUGGCCACUUGACC   |
| asiAR-033 | CCAGGAUGCUUACUU   | AAGUAGAGCAUCCUGGAGUUG  |
| asiAR-034 | UCCAGGAUGCUCUACU  | AGUAGAGCAUCCUGGAGUUGA  |
| asiAR-035 | AACUCCAGGAUGCUCU  | AGAGCAUCCUGGAGUUGACAU  |
| asiAR-036 | UACCCGAUGCACAAGU  | ACUUGGCAUUGCGGUACUUAU  |
| asiAR-037 | AGUACCGCAUGCACAA  | UUUGCAUUGCGGUACUUAUUG  |
| asiAR-038 | CAAUGAGUACCGCAUG  | CAUGCGGUACUUAUUGAAAC   |
| asiAR-039 | UCAAUAGUACCGCAU   | AUGCGGUACUUAUUGAAACC   |
| asiAR-040 | UUCAAUGAUACCGCA   | UGCGGUACUUAUUGAAACCA   |
| asiAR-041 | UUGGAUUGCCUCAAUU  | AUUUGGAGCCAUCAAACUUCU  |
| asiAR-042 | AGUUUGGAUGGCUCCA  | UGGAGCCAUCAAACUUAUGA   |
| asiAR-043 | AGAGUUUGGAUGGCU   | GAGCCAUCAAACUUAUGAGA   |
| asiAR-044 | UCAAGGAUCUGAUCG   | CGAUCGAGUUCUUAUGAUGUAG |
| asiAR-045 | CAUCAAGGAACUCGAU  | AUCGAGUUCUUAUGAUGUAGU  |
| asiAR-046 | CUACAUCAAGGAACUC  | GAGUUCUUAUGAUGAUGUUAU  |
| asiAR-047 | GAACUACAUAAGGAA   | UUCCUUAUGAUGAUGUUAUUCG |
| asiAR-048 | CUUCGAAUGAACUACA  | UGUAGUUAUUCGAAGUUAU    |
| asiAR-049 | UGAAUCUUGAAUGAAC  | GUUCAUUCGAAGUUAUCAAAA  |
| asiAR-050 | UGAUGAACUUCGAAUG  | CAUUCGAAGUUAUCAAAAAG   |
| asiAR-051 | GGGCUGAAAUAUCAA   | UUUGAUUUUCAGGCCAUCCA   |
| asiAR-052 | GAUGGGCUGAAAAUUC  | GAUUUUUCAGGCCAUCCAUG   |
| asiAR-053 | UAUCCAGUGGAUGGG   | CCCAUCCACUGGAAUUAUUGCU |
| asiAR-054 | CAUUUUCCAGUGGUAU  | AUCCACUGGAAUUAUUGCUGAA |
| asiAR-055 | AGCAUUUUCCAGUGG   | CCACUGGAAUUAUUGCUGAAGA |
| asiAR-056 | UUCAGCAUUUUCCAG   | CUGGAAUUAUGCUGAAGAGAG  |
| asiAR-057 | CUCUUCAGCAUUUUUC  | GAAUUAUUGCUGAAGAGAGCAG |
| asiAR-058 | CUGCUCUCUUCAGCAU  | AUGCUGAAGAGAGCAGUGUCU  |
| asiAR-059 | AAGCACUGCUCUCUUC  | GAAGAGAGCAGUGCUCUUAUCG |
| asiAR-060 | GAAAGCACUGCUCUCU  | AGAGAGCAGUGCUCUUAUCAG  |
| asiAR-061 | CAUGAAAGCACUGCUC  | GAGCAGUGCUCUUAUCGACAG  |
| asiAR-062 | GUGCAUGAAAGCACUG  | CAGUGCUCUUAUCGACAGGAA  |
| asiAR-063 | UUCUGUGCAUGAAAG   | CUUUCAGCAGGAAUUAUCCU   |
| asiAR-064 | GAAUUCUGUGCAUGA   | UCAUGCAGGAAUUAUCCUGGG  |
| asiAR-065 | AGGAAUUCUGUGCAU   | AUGCACAGGAAUUAUCCUGGGG |
| asiAR-066 | UCACCAAGCUCUUGGA  | UCCAGGAGCUUGGUGAGCUGG  |
| asiAR-067 | ACCAGCUCACCAAGCU  | AGCUUGGUGAGCUGGUGAAG   |
| asiAR-068 | CUACCAGCUCACCAAG  | CUUGGUGAGCUGGUGAAGAGCG |
| asiAR-069 | ACCUGCUAAUCAAGUC  | GACUUGAUUAGCAGGUCAAAA  |
| asiAR-070 | GACUCUGCUAAUCAAGU | ACUUGAUUAGCAGGUCAAAA   |
| asiAR-071 | UUUGACUCUAAUCA    | UGAUUAGCAGGUCAAAAUGA   |
| asiAR-072 | CUUUUGACUCUAAU    | AUUAGCAGGUCAAAAUGAAC   |
| asiAR-073 | UCACUUUUGACUCU    | AGCAGGUCAAAAUGAACUGA   |
| asiAR-074 | UUCACUUUUGACUCU   | GCAGGUCAAAAUGAACUCUGA  |
| asiAR-075 | CAGUUAUCUUUGACC   | GGUCAAAAUGAACUCUGAUGCA |
| asiAR-076 | CAUCAGUUAUCUUUUG  | CAAAAGUGAACUCUGAUGCAGC |
| asiAR-077 | CUGCAUCAGUUCACUU  | AAGUGAACUGAUGCAGCUCUC  |
| asiAR-078 | GCUGCAUCAGUUCACU  | AGUGAACUGAUGCAGCUCUCU  |
| asiAR-079 | CCAUCUUAUUCACAC   | GUGUGGAAUUAUGAUGGGCUCU |
| asiAR-080 | CCCAUCUUAUUCACAC  | UGUGGAAUUAUGAUGGGCUGA  |
| asiAR-081 | AGCCAUUAUUAUCA    | UGGAAUUAUGAUGGGCUGAUG  |
| asiAR-082 | UCAAGCCAUUAUUAU   | AAAUUAUGAUGGGCUGACUUC  |
| asiAR-083 | GGAAGUCAGCCCAU    | AUGGGCUGACUUUCCAGAA    |
| asiAR-084 | CUGGGAAGUCAGCC    | GGCUUGACUUUCCAGAAAGG   |
| asiAR-085 | UUUCUGGGAAGUCA    | UUGACUUUCCAGAAAGGAUC   |
| asiAR-086 | UCCUUUCUGGGAAGU   | ACUUUCCAGAAAGGAUCUUG   |
| asiAR-087 | CCAAGAUCCUUUCUG   | CCAGAAAGGAUCUUGGGCACU  |
| asiAR-088 | UGCCCAAGAUCCUUUC  | GAAAGGAUCUUGGGCACUUGC  |

Table S1. List of 88 asiRNA targeting AR

# Fig S1

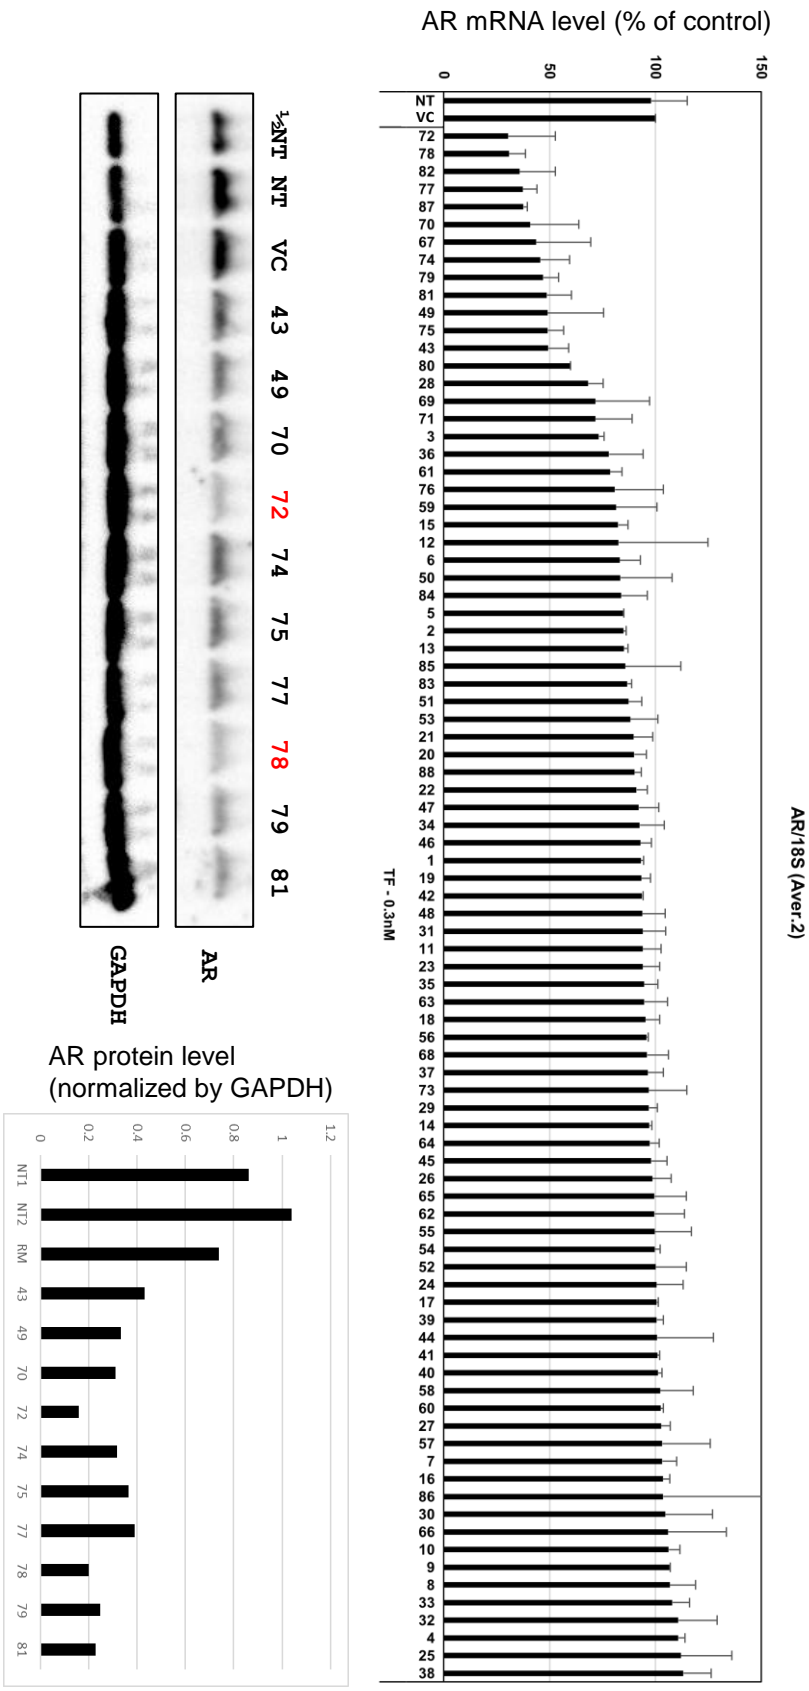

Fig S1. KD efficacy of 88 asiAR in *in vitro* screening (Top) A549 cells were transfected with 0.3 nM asiRNA targeting AR using RNAiMAX as a transfection agent. NT: non-treated, VC: RNAiMAX only. Relative AR mRNA level normalized by 18S RNA was shown (n=2). AR and GAPDH protein level was shown by immunoblotting in selected samples. (Bottom) AR protein level was quantitated by measuring relative intensity of AR over GAPDH protein band.

Fig S2

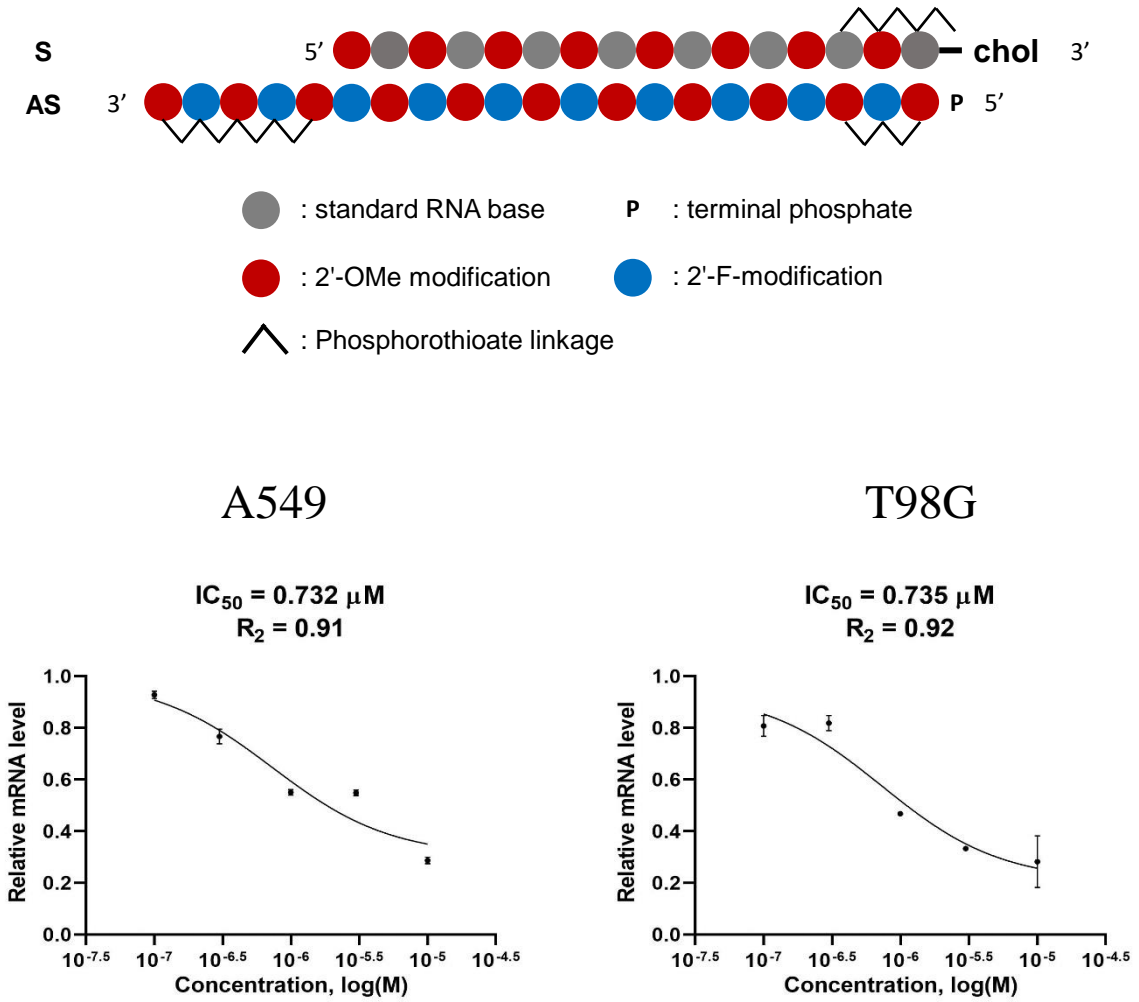

Fig S2. (Top) Structure of cp-asiAR. (Bottom) mRNA knockdown data was used to calculate IC<sub>50</sub> value. Graph was drawn using from the Prism 8.0 software (GraphPad).

Fig S3

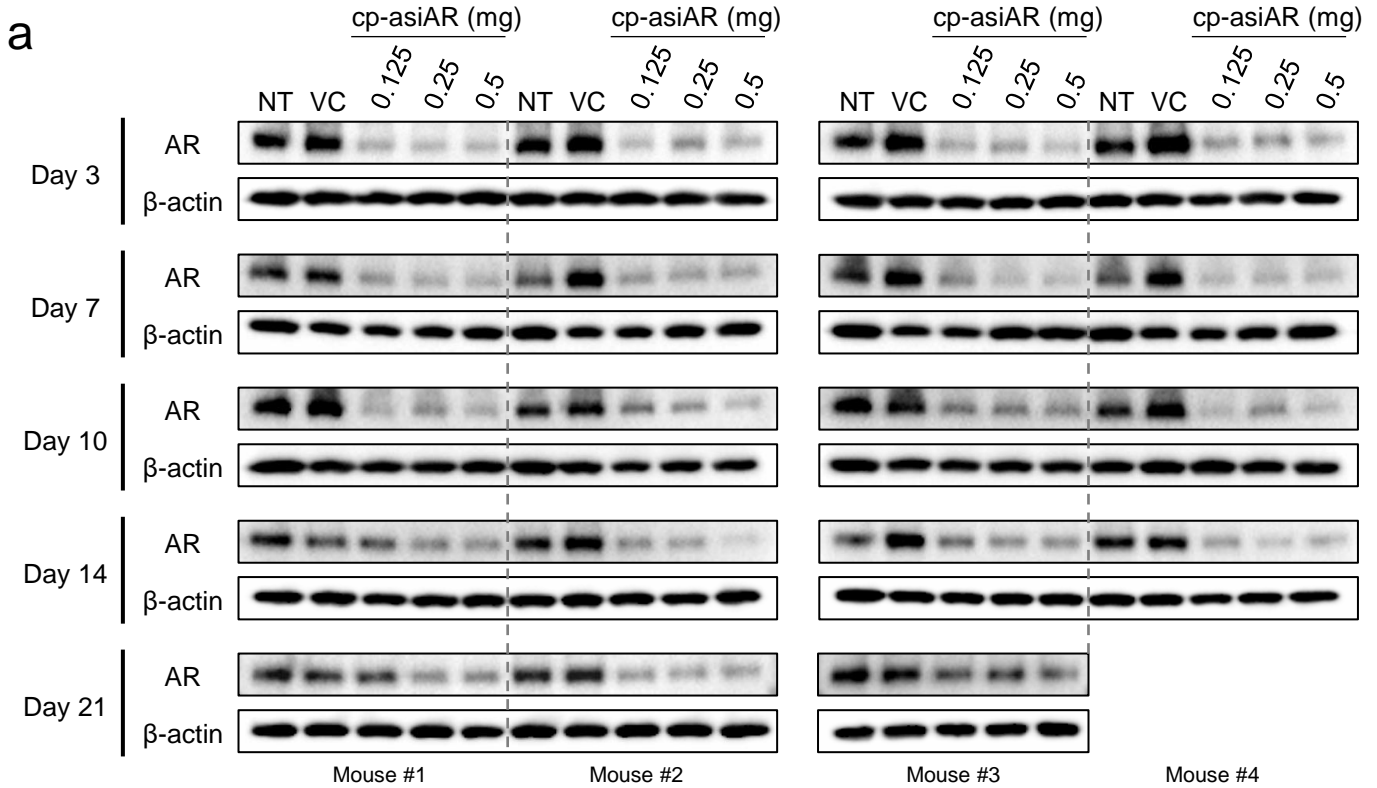

Fig S3. AR protein level by western blot analysis. Injection sites of the dorsal skin were prepared at the indicated time post-injection. Four mice were used at each time point. Mouse #4 belong to at day 21 group become sick for unknown reason (not related to injection) and removed from the analysis.

Fig S4

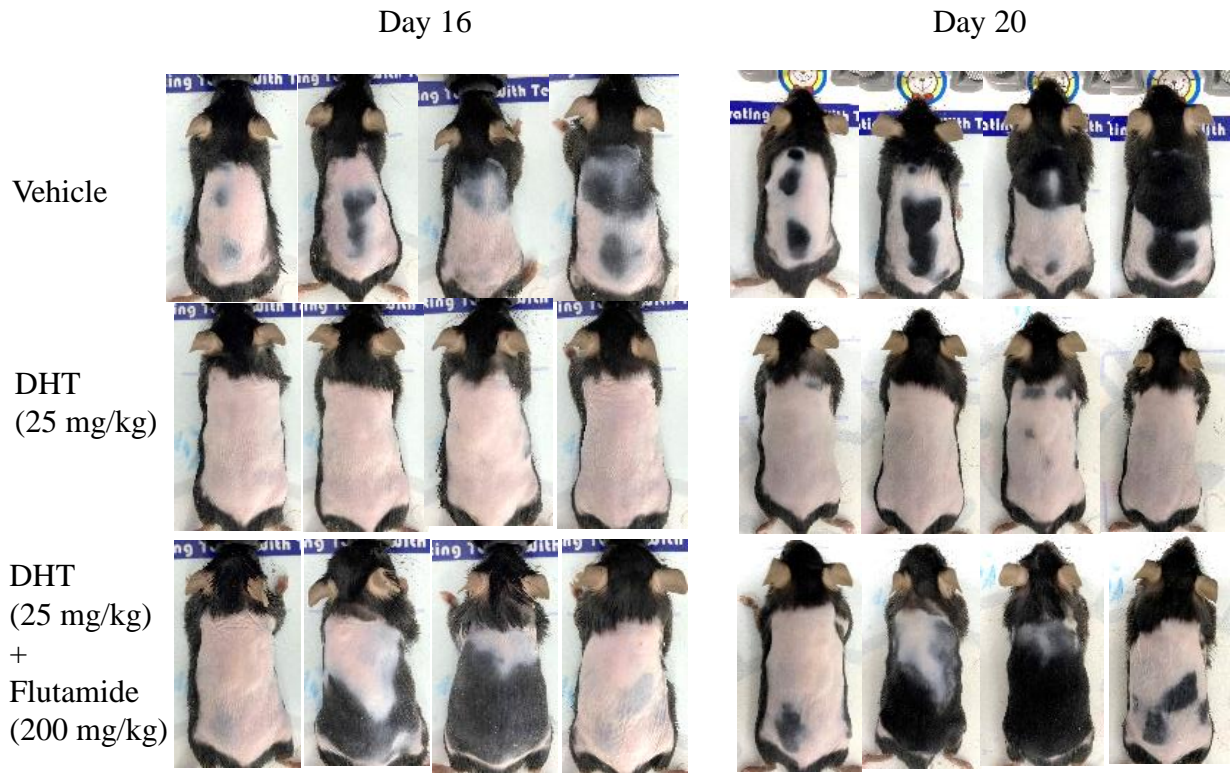

Fig S4. Comparison of hair regrowth on dorsal skin between vehicle and DHT-treated mouse. Vehicle-treated mouse dorsal skin enters active hair regrowth phase during third week after shaving. Hair regrowth is significantly inhibited by subcutaneous injection of DHT. Flutamide co-treated mouse recovered the hair growth efficacy comparable to non-DHT-treated (Vehicle) mouse.

Fig S5

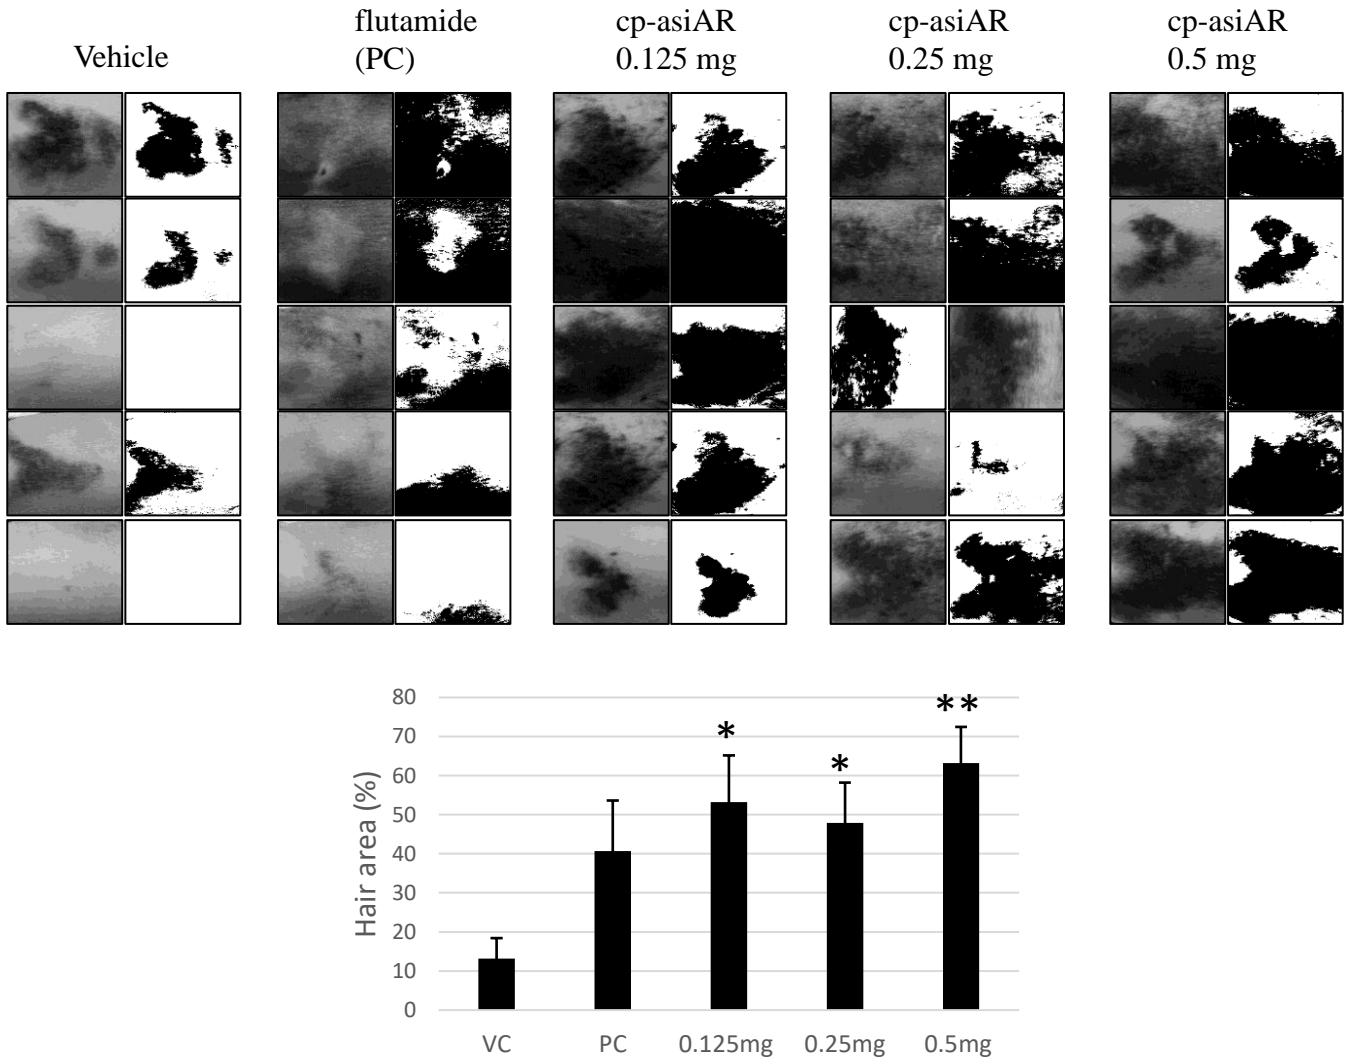

Fig S5. Quantitation of hair regrown area at day 15 by image analysis on dorsal skin between vehicle and DHT-treated mouse.

Dorsal skin images were transformed to gray scale and to black and white image in fixed parameter using ImageJ software. Black areas was quantified in the ImageJ and presented as mean and standard deviation. Statistical significance was calculated using t-test with the vehicle control (\*,  $p < 0.05$ ; \*\*,  $p < 0.01$ ).

Fig S6

G1: Vehicle control  
G2: Flutamide 200 mpk  
G3: cp-asiAR 0.125 mg  
G4: cp-asiAR 0.25 mg  
G5: cp-asiAR 0.5 mg

A/T ratio

|           |                                                                                     |                                                                                     |                                                                                      |      |
|-----------|-------------------------------------------------------------------------------------|-------------------------------------------------------------------------------------|--------------------------------------------------------------------------------------|------|
| <b>G1</b> | 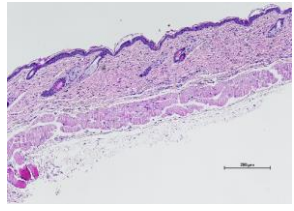   |    |    | 0/7  |
| <b>G2</b> |    |    |    | 19/1 |
| <b>G3</b> |    |    |    | 24/2 |
| <b>G4</b> |   |   |   | 19/3 |
| <b>G5</b> |  |  |  | 18/1 |

Fig S6. Quantitation of anagen and telogen hair follicles from vertical section of dorsal skin between vehicle, flutamide, or cp-asiAR treated groups.

All groups were treated with DHT. Hair follicles in the subcutaneous layer with bulb shape was counted as anagen. Hair follicles in the dermis layer with dermal papilla was counted as telogen. Total numbers from three images (single image/mouse) were shown in the right. We cannot discriminate the catagen hair from the anagen hair.

Fig S7

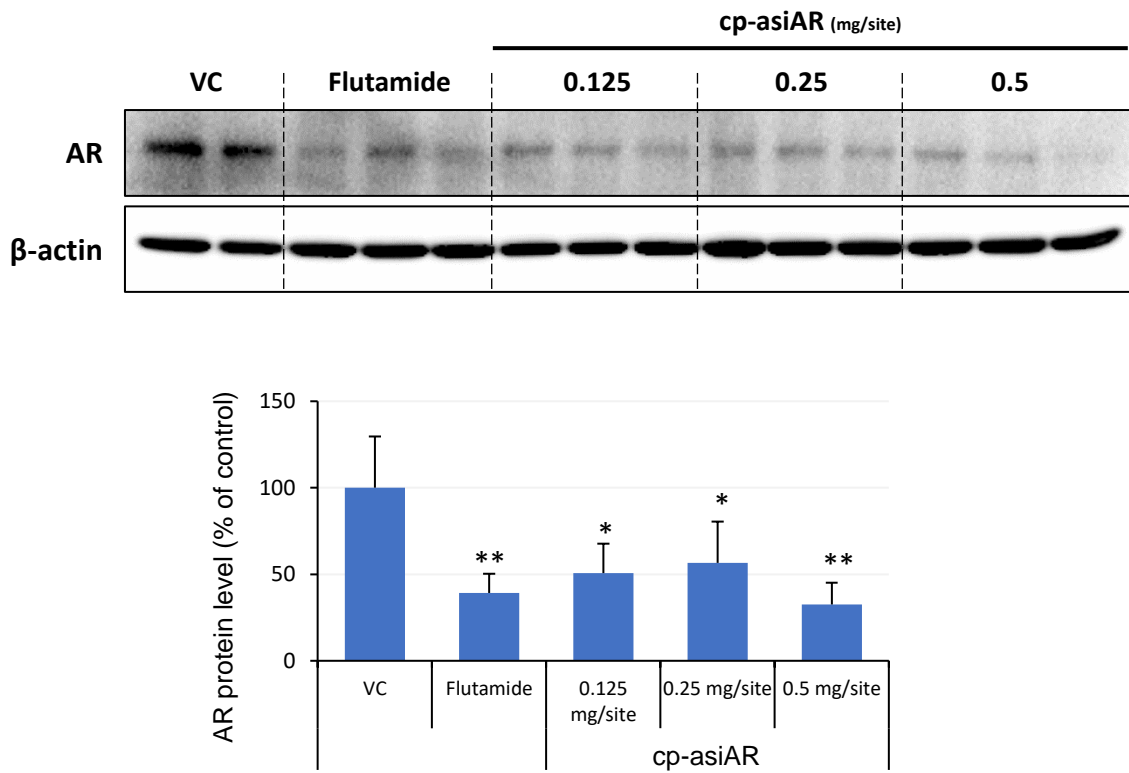

Fig S7. AR knockdown in dorsal skin in AGA models

After hair regrowth experiment (at day 21), dorsal skin was isolated and prepared for AR protein analysis. Three out of five were shown as representative results. AR protein level relative to the vehicle control was shown as mean and standard deviation (n=5). Statistical significance was calculated by t-test with the vehicle control (\*,  $p < 0.05$ ; \*\*,  $p < 0.01$ ).



Fig S8

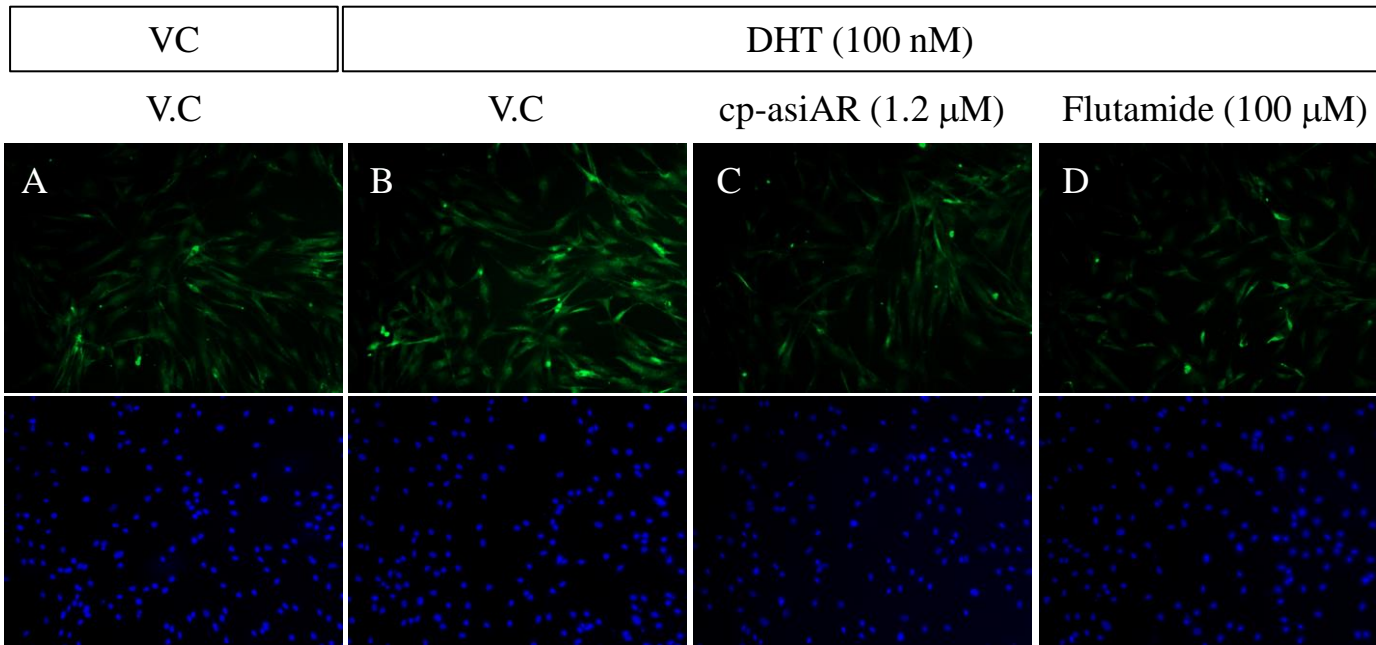

Fig S8. AR reduction by cp-asiAR in human primary DP cells

Human primary DP cells were treated with vehicle alone (A) or treated with vehicle, cp-asiAR or flutamide in the presence of DHT (B-D). At 24 hours after treatment, cells were fixed and immunostained with anti-AR antibodies. DAPI staining image was shown separately (bottom).

Fig S9

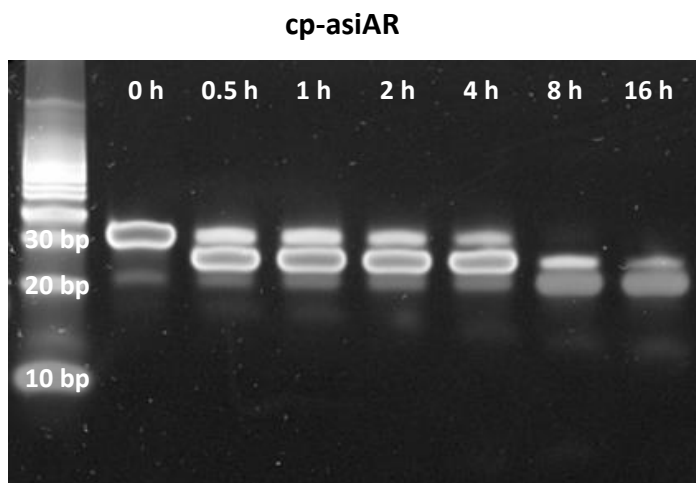

Fig S9. Stability profiling of cp-asiAR

cp-asiRNA duplex were incubated with RNaseA (7.8  $\mu\text{g/ml}$ ) for indicated time. After incubation, reaction samples were loaded in the native PAGE with DNA ladder (10 bp).

## Table S2

| <b>Tissue<br/>/time (hr)</b> | <b>0.5</b> | <b>4</b> | <b>8</b> | <b>24</b> | <b>96</b> | <b>168</b> |
|------------------------------|------------|----------|----------|-----------|-----------|------------|
| Skin                         | 1250       | 516      | 382      | 81.4      | 76.1      | 34.5       |
| Plasma                       | 2.7        | 3.1      | 2.4      | 0.05      | BQL       | BQL        |
| Liver                        | 0.9        | 2.9      | 4.7      | 2.7       | 0.34      | 0.08       |
| Kidney                       | 0.3        | 2.8      | 4.1      | 4.6       | 3.5       | 3.4        |

Table S2. PK analysis of cp-asiAR in mouse tissues by intradermal injection. cp-asiAR was injected to three site of dorsal skin intradermally (0.5 mg/site, total 3 sites). Tissues were collected at the indicated time points and cp-asiAR was quantitated by HPLC method. (N=6 for skin, n=2 for other tissues)

# Supplemental methods

## 1. Stability profiling of cp-asiAR

Duplex cp-asiAR (final concentration 1  $\mu\text{M}$ ) was incubated with RNase A (final concentration 7.8  $\mu\text{g/ml}$ , 12091021, Invitrogen) at 37°C and aliquots of mixture was sampled at 0.5, 1, 2, 4, 8, and 16 hours. Samples were electrophoresed in the 15% Native PAGE and stained with Gel-red stain (SCT123, Millipore). RNase A was not included in 0 hour incubation sample.

## 2. Bioanalysis and pharmacokinetic analysis of cp-asiAR in mouse tissues

The bioanalytical methods used for this study were based on the previous reports<sup>1</sup>. Briefly, peptide nucleic acid (PNA) hybridization assay was coupled to high-performance liquid chromatography (HPLC) with fluorescence detection (FD). The PNA probe complementarily and effectively binds to the antisense strand of the cp-asiAR. The anion exchange chromatography enables the efficient separation of unhybridized PNA and auto-fluorescent materials in tissue from hybridized antisense-PNA. Also, the detection of the fluorescence dye conjugated to the PNA probe improves the sensitivity. These two methods were qualified using rat skin and plasma before the sample analysis. The lower limit of quantification (LLOQ) in the skin is 100 ng/g and LLOQ in plasma is 2.00 ng/mL. The PK parameters were calculated based on the non-compartmental analysis after extravascular administration using PKSolver, an add-in program for pharmacokinetic analysis in Microsoft Excel. The area under the concentration-time curve (AUC) was calculated using the linear trapezoidal method (linear interpolation).

## 3. Immunostaining of AR in human DP cells

Each group of cells treated with the corresponding agent(s) were washed with PBS and fixed using 10% formalin solution (HT501128; Sigma-Aldrich, Saint Louis, MO). They were sequentially reacted with Permeabilization buffer. 1x (00-8333-56; Invitrogen, Waltham, MA, USA) and AR antibody (Sc7305; Santa Cruz, Dallas, TX, 1:50), and then with Alexa Fluor™ 488 mouse (A21202; Thermo, Waltham, MA, USA, 1:500). Staining of the nucleus was done using DAPI (62248; Thermo, Waltham, MA, USA). Fluorescence Mounting Medium (s3023; DAKO, Glostrup, Hovedstaden, Denmark) was added before mounting the cover glass. Images were obtained using Fluorescence microscope (Carl Zeiss, Land Baden-Württemberg, Oberkochen, Germany).

(1) Tian, Q.; Rogness, J.; Meng, M.; Zheng, L. Quantitative determination of a siRNA (AD00370) in rat plasma using peptide nucleic acid probe and HPLC with fluorescence detection. *Bioanalysis* **2017**, 9 (11), 861-872. DOI: 10.4155/bio-2017-0017

# Uncropped WB images

Complete WB images for Figure 1.

(Top) AR western blot images were shown. Red box was cropped.

(Bottom) b-actin western blot images were shown. Red box was cropped.

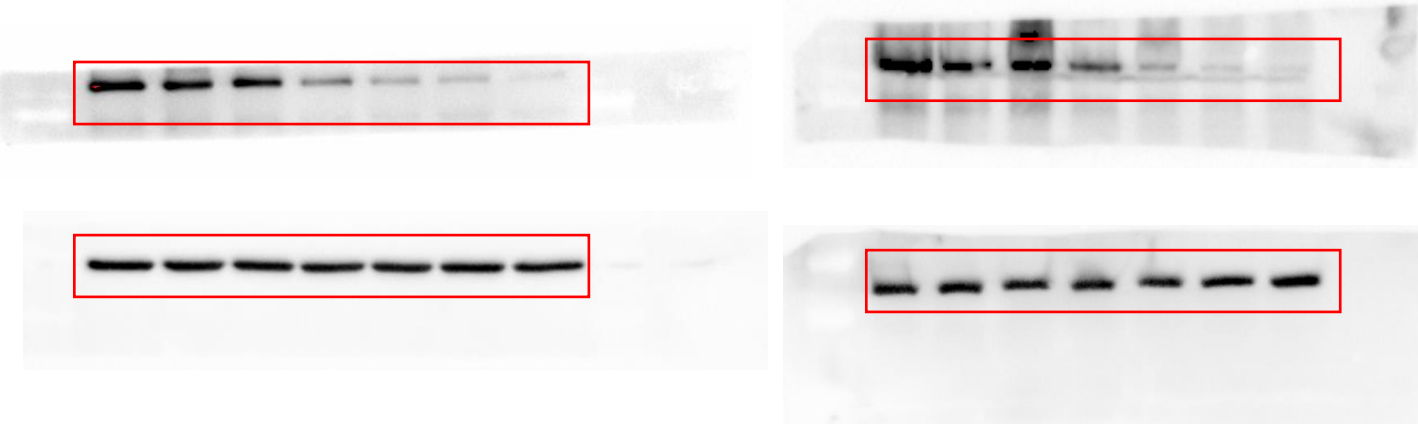

Complete WB images for Figure 2B.

(Top) AR western blot images were shown. Red box was cropped.

(Bottom) b-actin western blot images were shown. Red box was cropped.

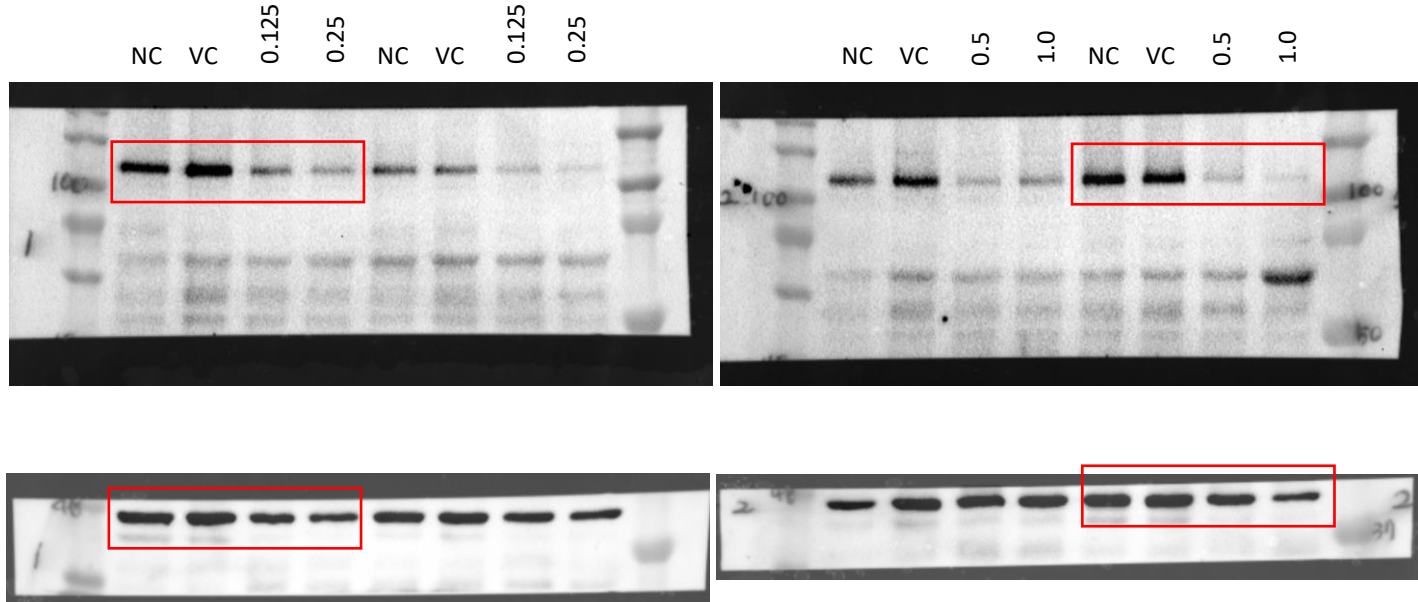

# Uncropped WB images

Complete WB images for Figure 5B.

AR, DKK-1, IL-6, TGF- $\beta$ 1 and  $\beta$ -actin western blot images were shown. Red box was cropped.

AR

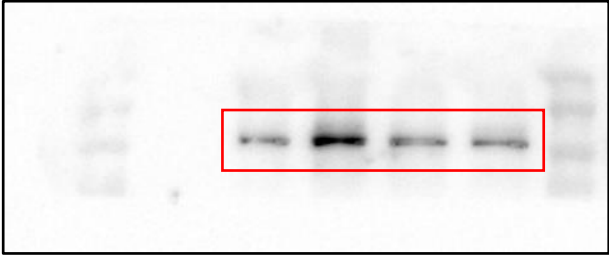

DKK-1

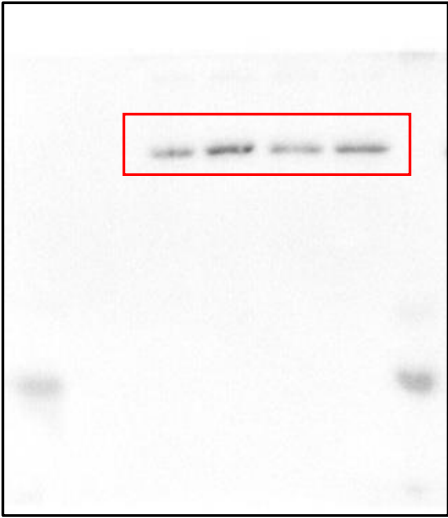

TGF- $\beta$ 1

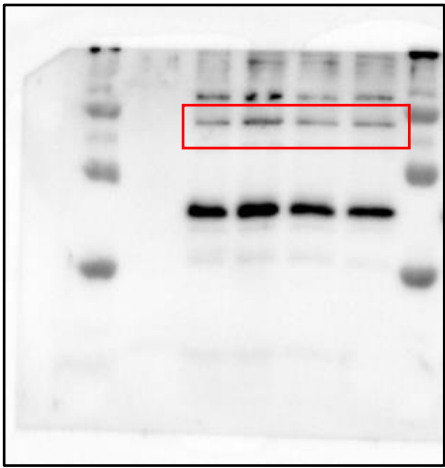

IL-6

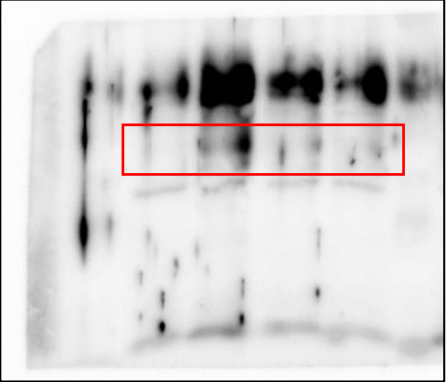

$\beta$ -actin

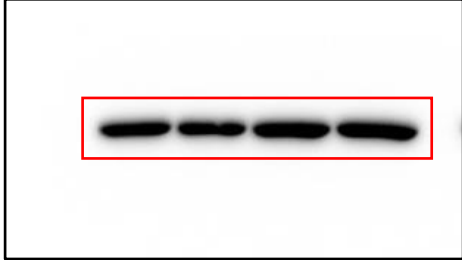

Supplement: mp2c00510_si_001.pdf [file mp2c00510_si_001.pdf]
